# Supplementary material for: Mitigating the Effect of Climate Change within the Cereal Sector: Improving Rheological and Baking Properties of Strong Gluten Wheat Doughs by Blending with Specialty Grains
Source: MDPI journal article supplement (doi:10.3390/plants12030492), 2023-01-21
Supplement: s1 [file s1]

**Table S1.** Pearson correlation of chemical and rheological data.

|                          |          | Water<br>absorption<br>[%] | Dough<br>development<br>time [min] | Dough<br>stability<br>[min] | Dough<br>softening<br>[BU] | Energy<br>[cm <sup>2</sup> ] | Dough<br>resistance<br>[BU] | Extensibility<br>[mm] | Ratio<br>number |
|--------------------------|----------|----------------------------|------------------------------------|-----------------------------|----------------------------|------------------------------|-----------------------------|-----------------------|-----------------|
| <b>Ash</b>               | <i>r</i> | 0.9235                     | 0.5038                             | 0.7301                      | 0.5277                     | -<br>0.7474                  | -0.5656                     | -0.1249               | -0.5051         |
|                          | <i>p</i> | 0.0251                     | 0.3868                             | 0.1614                      | 0.3607                     | 0.1465                       | 0.3204                      | 0.8414                | 0.3854          |
| <b>Protein</b>           | <i>r</i> | 0.8959                     | 0.3408                             | 0.6217                      | 0.3489                     | -<br>0.7242                  | -0.5831                     | -0.1836               | -0.5167         |
|                          | <i>p</i> | 0.0397                     | 0.5747                             | 0.2628                      | 0.5649                     | 0.1665                       | 0.3021                      | 0.7675                | 0.3727          |
| <b>Fat</b>               | <i>r</i> | 0.4844                     | -0.2751                            | -0.0271                     | 0.7096                     | -<br>0.0544                  | 0.1832                      | -0.8098               | 0.2654          |
|                          | <i>p</i> | 0.4083                     | 0.6542                             | 0.9655                      | 0.1794                     | 0.9308                       | 0.768                       | 0.0967                | 0.6661          |
| <b>Starch</b>            | <i>r</i> | -0.5213                    | 0.0932                             | 0.0277                      | 0.0154                     | 0.1765                       | 0.0123                      | 0.7321                | -0.0723         |
|                          | <i>p</i> | 0.3677                     | 0.8815                             | 0.9647                      | 0.9804                     | 0.7764                       | 0.9844                      | 0.1596                | 0.908           |
| <b>Dietary<br/>fiber</b> | <i>r</i> | -0.0421                    | -0.0801                            | -0.167                      | -0.8331                    | -<br>0.0395                  | -0.1576                     | -0.0065               | -0.1505         |
|                          | <i>p</i> | 0.9464                     | 0.8981                             | 0.7883                      | 0.0798                     | 0.9498                       | 0.8002                      | 0.9917                | 0.8091          |

**Table S2.** Physical baking properties (Specific volume, volume yield, texture, baking loss) of the SWB including alternative cereal (red sorghum, white sorghum, millet, amaranth, buckwheat).

| Addition [%]  |                                   | 0             | 5              | 10              | 15             | 20            | 25             | 30             | 35            | 40            |
|---------------|-----------------------------------|---------------|----------------|-----------------|----------------|---------------|----------------|----------------|---------------|---------------|
| Red sorghum   | Specific volume [ml/g]            | 2.59±0.24f    | 2.33±0.06de    | 2.41±0.05e      | 2.31±0.05cd    | 2.34±0.04de   | 2.21±0.11b     | 2.24±0.13bc    | 2.06±0.14a    | 2.12±0.07a    |
|               | Parameter compared to control [%] | 100±9         | 90±3           | 90±2            | 89±2           | 90±2          | 85±5           | 86±6           | 80±7          | 82±3          |
| White sorghum | Specific volume [ml/g]            | 2.41±0.11e    | 2.36±0.18de    | 2.35±0.17de     | 2.4±0.11e      | 2.34±0.13de   | 2.28±0.11cd    | 2.25±0.14bc    | 2.19±0.08b    | 2.1±0.09a     |
|               | Parameter compared to control [%] | 100±5         | 98±8           | 98±7            | 100±5          | 97±6          | 95±5           | 93±6           | 91±4          | 87±4          |
| Millet        | Specific volume [ml/g]            | 2.75±0.25e    | 2.63±0.23de    | 2.5±0.22cd      | 2.5±0.25cd     | 2.46±0.19bc   | 2.34±0.12ab    | 2.32±0.18a     | 2.25±0.16a    | 2.23±0.26a    |
|               | Parameter compared to control [%] | 100±9         | 95.64±9        | 90.91±9         | 90.91±10       | 89.45±8       | 85.09±5        | 84.36±8        | 81.82±7       | 81.09±12      |
| Amaranth      | Specific volume [ml/g]            | 2.69±0.11e    | 2.54±0.16d     | 2.57±0.08d      | 2.49±0.12cd    | 2.41±0.11c    | 2.19±0.14b     | 1.91±0.08a     | 1.9±0.11a     | 1.81±0.08a    |
|               | Parameter compared to control [%] | 100±4         | 94.42±6        | 95.54±3         | 92.57±5        | 89.59±5       | 81.41±6        | 71±4           | 70.63±6       | 67.29±4       |
| Buckwheat     | Specific volume [ml/g]            | 2.58±0.1h     | 2.45±0.1g      | 2.37±0.03c      | 2.37±0.14c     | 2.17±0.03e    | 2.1±0.04d      | 2.01±0.04c     | 1.91±0.07b    | 1.81±0.08a    |
|               | Parameter compared to control [%] | 100±4         | 94.96±4        | 91.86±1         | 91.86±6        | 84.11±1       | 81.4±2         | 77.91±2        | 74.03±4       | 70.16±4       |
| Red sorghum   | Volume yield [ml/100g flour]      | 380.4±27.14f  | 347.36±9.12de  | 358.32±6.29e    | 344.96±5.79cd  | 347.6±6.27d   | 328.45±18.19b  | 335.55±18.77bc | 308.56±21.02a | 317.12±11.46a |
|               | Parameter compared to control [%] | 100±7         | 91±3           | 94±2            | 91±2           | 91±2          | 86±6           | 88±6           | 81±7          | 83±4          |
| White sorghum | Volume yield [ml/100g flour]      | 361.08±16.16f | 353.19±24.83ef | 351.27±22.84def | 356.5±18.16ef  | 347.81±17.7de | 339.41±14.89cd | 333.24±19.15bc | 325.8±12.89b  | 313.33±14.23a |
|               | Parameter compared to control [%] | 100±4         | 98±7           | 97±7            | 99±5           | 96±5          | 94±4           | 92±6           | 90±4          | 87±5          |
| Millet        | Volume yield [ml/100g flour]      | 392.85±33.53d | 375.95±30.97de | 360.45±30.36bc  | 359.69±32.99bc | 354.42±27.49b | 336.28±15.51a  | 331.39±22.68a  | 323.6±18.68a  | 319.53±29.45a |
|               | Parameter compared to control [%] | 100±9         | 95.7±8         | 91.76±8         | 91.56±9        | 90.22±8       | 85.6±5         | 84.36±7        | 82.37±6       | 81.2±9        |
| Amaranth      | Volume yield [ml/100g flour]      | 392.85±33.53f | 375.95±30.97ab | 360.45±30.36e   | 359.69±32.99e  | 354.42±27.49d | 336.28±15.51c  | 331.39±22.68b  | 323.6±18.68ab | 319.53±29.45a |
|               | Parameter compared to control [%] | 100±3         | 95±4           | 95±3            | 92±4           | 88±5          | 81±7           | 71±4           | 71±5          | 67±4          |
| Buckwheat     | Volume yield [ml/100g flour]      | 380.41±14.42h | 359.5±13.96g   | 350.86±5.51f    | 347.58±18.5f   | 319.62±4.16e  | 310.22±4.53d   | 296.71±4.61c   | 281.24±10.17b | 263.81±8.7a   |
|               | Parameter compared to control [%] | 100±4         | 95±4           | 92±2            | 91±5           | 84±1          | 82±1           | 78±2           | 74±4          | 69±3          |
| Red sorghum   | Crumb texture [N]                 | 28.58±7.22a   | 33.48±3.62bc   | 32±2.49bc       | 32.07±3.6bc    | 30.36±3.91ab  | 33.76±7.4bc    | 34.33±6.92c    | 41.1±10.08d   | 38.51±7.71d   |
|               | Parameter compared to control [%] | 100±25        | 117±11         | 112±8           | 112±11         | 106±13        | 118±22         | 120±20         | 144±26        | 135±20        |
| White sorghum | Crumb texture [N]                 | 36±3.13abc    | 37±5.25bc      | 36±4.86bc       | 33±3.93a       | 35±5.16ab     | 35±6.11ab      | 37±7.06bc      | 39±5.32c      | 43±7.32d      |
|               | Parameter compared to control [%] | 100±9         | 103±14         | 102±13          | 92±12          | 98±15         | 98±18          | 105±19         | 108±14        | 120±17        |
| Millet        | Crumb texture [N]                 | 26.77±4.77a   | 29.8±3.95ab    | 33.55±6.61bc    | 32.61±6.37bc   | 30.24±6.95ab  | 32.56±5.25bc   | 35.94±9.7cd    | 39.56±9.12d   | 45.17±16.04e  |
|               | Parameter compared to control [%] | 100±18        | 111.32±13      | 125.33±20       | 121.82±20      | 112.96±23     | 121.63±16      | 134.25±27      | 147.78±23     | 168.73±36     |
| Amaranth      | Crumb texture [N]                 | 22.96±3.46a   | 26.23±2.61c    | 24.85±2.93abc   | 23.48±3.1ab    | 25.78±6.27bc  | 30.29±3.82d    | 38.29±4.37e    | 39.68±7.03ef  | 41.41±5.21f   |
|               | Parameter compared to control [%] | 100±15        | 114±10         | 108±12          | 102±13         | 112±24        | 132±13         | 167±11         | 173±18        | 180±13        |
| Buckwheat     | Crumb texture [N]                 | 30.66±3.11a   | 35.68±3.8b     | 37.42±2.9b      | 41.86±5.63c    | 48.77±4.92d   | 54.91±4.76e    | 63.57±6.23f    | 72.95±7.22g   | 92.21±9.36h   |
|               | Parameter compared to control [%] | 100±10        | 116±11         | 122±8           | 137±13         | 159±10        | 179±9          | 207±10         | 238±10        | 301±10        |
| Red sorghum   | Relative Elasticity [%]           | 54.75±1.69g   | 53.49±1.26f    | 52.85±1.25e     | 52.07±1.33d    | 51.79±0.84d   | 50.11±1.29bc   | 50.25±0.9c     | 49.6±0.91ab   | 49.35±0.89a   |
|               | Parameter compared to control [%] | 100±3         | 98±2           | 97±2            | 95±3           | 95±2          | 92±3           | 92±2           | 91±2          | 90±2          |
| White sorghum | Relative Elasticity [%]           | 54.18±1.12a   | 52.98±1.2b     | 51.97±1.27c     | 51.97±1.27c    | 51.15±0.72d   | 50.51±0.99f    | 50.5±0.79f     | 49.97±0.82fg  | 49.56±0.9g    |
|               | Parameter compared to control [%] | 100±2         | 98±2           | 96±2            | 96±2           | 94±1          | 93±2           | 93±2           | 92±2          | 91±2          |
| Millet        | Relative Elasticity [%]           | 54.8±1.95f    | 53.16±1.57e    | 52.18±1.06d     | 51.78±1.43cd   | 51.8±1.05cd   | 51.57±1.06cd   | 51.02±1.36bc   | 50.62±1.52b   | 49.31±2.49a   |
|               | Parameter compared to control [%] | 100±4         | 97±3           | 95±2            | 94±3           | 95±2          | 94±2           | 93±3           | 92±3          | 90±5          |
| Amaranth      | Relative Elasticity [%]           | 54.72±2.12f   | 52.57±1.55e    | 51.4±1.69d      | 50.45±1.52d    | 51.31±2.84d   | 48.88±1.91c    | 47.68±1.93b    | 47.04±1.63ab  | 46.39±1.45a   |
|               | Parameter compared to control [%] | 100±4         | 96±3           | 94±3            | 92±3           | 94±6          | 89±4           | 87±4           | 86±3          | 85±3          |
| Buckwheat     | Relative Elasticity [%]           | 53.93±0.79f   | 53.12±0.9ef    | 52.11±1.11cd    | 51.87±0.99bcd  | 52.14±0.9d    | 51.46±1.03ab   | 51.45±1.22ab   | 51.31±1.15a   | 51.59±0.85abc |
|               | Parameter compared to control [%] | 100±15        | 114±10         | 108±12          | 102±13         | 112±24        | 132±13         | 167±11         | 173±18        | 180±13        |
| Red sorghum   | Baking loss [%]                   | 11.07±2.13b   | 9.31±0.29a     | 9.08±0.93b      | 8.97±0.73a     | 9.29±0.69a    | 9.42±0.64a     | 8.77±0.11a     | 8.74±0.31a    | 9.06±0.8a     |
|               | Parameter compared to control [%] | 100±19        | 84±3           | 82±10           | 81±8           | 84±7          | 85±7           | 79±1           | 79±4          | 82±9          |
| White sorghum | Baking loss [%]                   | 8.91±0.18a    | 8.83±0.51a     | 9.09±0.89abc    | 9.63±0.47d     | 9.52±0.31cd   | 9.36±0.23bcd   | 9.62±0.45d     | 9.44±0.5bcd   | 9.03±0.44ab   |
|               | Parameter compared to control [%] | 100±2         | 99±6           | 102±10          | 108±5          | 107±3         | 105±2          | 108±5          | 106±5         | 101±5         |
| Millet        | Baking loss [%]                   | 11.76±3.66a   | 11.78±3.67a    | 11.03±3.45a     | 11.14±3.47a    | 11.33±3.54a   | 11.46±3.57a    | 11.67±3.64a    | 11.26±3.51a   | 11.63±3.73a   |
|               | Parameter compared to control [%] | 100±31        | 100±31         | 94±31           | 95±31          | 96±31         | 97±31          | 99±31          | 96±31         | 99±32         |
| Amaranth      | Baking loss [%]                   | 11.81±2.9ab   | 11.5±2.86b     | 12.96±0.98a     | 12.76±0.64ab   | 13.09±0.51a   | 12.66±0.5ab    | 11.77±0.69ab   | 12.17±0.74ab  | 11.82±0.75ab  |
|               | Parameter compared to control [%] | 100±25        | 97±25          | 110±8           | 108±5          | 111±4         | 107±4          | 100±6          | 103±6         | 100±6         |
| Buckwheat     | Baking loss [%]                   | 10±0.6abc     | 10.3±0.36c     | 9.67±0.49a      | 10.2±0.65bc    | 9.91±0.3abc   | 9.8±0.62ab     | 9.95±0.62abc   | 10.04±0.29abc | 9.77±0.5ab    |
|               | Parameter compared to control [%] | 100±6         | 103±3          | 97±5            | 102±6          | 99±3          | 98±6           | 100±6          | 100±3         | 98±5          |

Different superscript letters denote significant differences within the same row (evaluated by the Fisher's Least Significant Difference test)

**Table S3.** Physical baking properties (Specific volume, volume yield, texture, baking loss) of the MWB including alternative cereal (red sorghum, white sorghum, millet, amaranth, buckwheat).

| Addition [%]  |                                   | 0              | 5              | 10             | 15             | 20             | 25             | 30             | 35             | 40             |
|---------------|-----------------------------------|----------------|----------------|----------------|----------------|----------------|----------------|----------------|----------------|----------------|
| Red sorghum   | Specific volume [ml/g]            | 2.55±0.14bc    | 2.58±0.17bc    | 2.57±0.13bc    | 2.54±0.16bc    | 2.6±0.15bc     | 2.49±0.07b     | 2.33±0.13a     | 2.35±0.13a     | 2.29±0.13a     |
|               | Parameter compared to control [%] | 100±5          | 101±7          | 101±5          | 100±6          | 102±6          | 98±3           | 91±6           | 92±6           | 90±6           |
| White sorghum | Specific volume [ml/g]            | 2.83±0.08d     | 2.62±0.12c     | 2.56±0.16bc    | 2.48±0.14a     | 2.56±0.1bc     | 2.54±0.1ab     | 2.49±0.12ab    | 2.52±0.05ab    | 2.5±0.04ab     |
|               | Parameter compared to control [%] | 100±3          | 93±5           | 90±6           | 88±6           | 90±4           | 90±4           | 88±5           | 89±2           | 88±2           |
| Millet        | Specific volume [ml/g]            | 2.29±0.2a      | 2.5±0.11c      | 2.6±0.15d      | 2.34±0.06ab    | 2.46±0.07c     | 2.43±0.27bc    | 2.41±0.08bc    | 2.35±0.13ab    | 2.31±0.19a     |
|               | Parameter compared to control [%] | 100±9          | 109.17±4       | 113.54±6       | 102.18±3       | 107.42±3       | 106.11±11      | 105.24±3       | 102.62±6       | 100.87±8       |
| Amaranth      | Specific volume [ml/g]            | 2.23±0.15cde   | 2.4±0.05e      | 2.31±0.1de     | 2.28±0.08cde   | 2±0.37bc       | 2.07±0.26bcd   | 1.77±0.38ab    | 1.68±0.29a     | 1.63±0.34a     |
|               | Parameter compared to control [%] | 100±7          | 107.62±2       | 103.59±4       | 102.24±4       | 89.69±19       | 92.83±13       | 79.37±21       | 75.34±17       | 73.09±21       |
| Buckwheat     | Specific volume [ml/g]            | 2.73±0.12def   | 2.66±0.13cd    | 2.79±0.22f     | 2.7±0.1de      | 2.77±0.1ef     | 2.62±0.1bc     | 2.67±0.11cd    | 2.58±0.07b     | 2.5±0.04a      |
|               | Parameter compared to control [%] | 100±4          | 97.44±5        | 102.2±8        | 98.9±4         | 101.47±4       | 95.97±4        | 97.8±4         | 94.51±3        | 91.58±2        |
| Red sorghum   | Volume yield [ml/100g flour]      | 454.99±22.88bc | 461.89±29.23bc | 459.51±22.02bc | 455.13±26.54bc | 466.37±26.55c  | 446.16±13.31b  | 415.52±22.47a  | 419.99±24.69a  | 409.65±23.47a  |
|               | Parameter compared to control [%] | 100±5          | 102±6          | 101±5          | 100±6          | 103±6          | 98±3           | 91±5           | 92±6           | 90±6           |
| White sorghum | Volume yield [ml/100g flour]      | 505.14±14.94c  | 470.31±22.99ab | 456.85±30.95a  | 458.38±14.03ab | 472.86±30.6b   | 467.26±25.31ab | 461.52±29.33ab | 466.54±18.6ab  | 461.74±20.19ab |
|               | Parameter compared to control [%] | 100±3          | 93±5           | 90±7           | 91±3           | 94±6           | 93±5           | 91±6           | 92±4           | 91±4           |
| Millet        | Volume yield [ml/100g flour]      | 411.11±28.07ab | 442.26±23.43d  | 461.11±27.45e  | 405.84±11.25a  | 431.98±8.12cd  | 424.41±46.31bc | 424.34±15.74bc | 412.33±24.06ab | 405.18±35.12a  |
|               | Parameter compared to control [%] | 100±7          | 107.58±5       | 112.16±6       | 98.72±3        | 105.08±2       | 103.24±11      | 103.22±4       | 100.3±6        | 98.56±9        |
| Amaranth      | Volume yield [ml/100g flour]      | 411.11±28.07bc | 442.26±23.43d  | 461.11±27.45cd | 405.84±11.25cd | 431.98±8.12bc  | 424.41±46.31cd | 424.34±15.74ab | 412.33±24.06a  | 405.18±35.12a  |
|               | Parameter compared to control [%] | 100±7          | 108±1          | 102±4          | 102±4          | 89±18          | 93±13          | 79±21          | 75±17          | 73±21          |
| Buckwheat     | Volume yield [ml/100g flour]      | 467.06±20.5def | 455.74±24.12cd | 477.02±37.51f  | 462.76±15.51de | 471.55±14.91ef | 448.97±15.1bc  | 458.34±14.28cd | 442.64±8.07ab  | 431.53±6.97a   |
|               | Parameter compared to control [%] | 100±4          | 98±5           | 102±8          | 99±3           | 101±3          | 96±3           | 95±2           | 92±2           | 92±2           |
| Red sorghum   | Crumb texture [N]                 | 20.48±2.51cd   | 19.56±1.66bc   | 19.03±2.36bc   | 18.91±2.64b    | 16.39±3.23a    | 18.67±2.62b    | 22.14±3.77e    | 19.55±2.67bc   | 21.18±3.63de   |
|               | Parameter compared to control [%] | 100±12         | 96±8           | 93±12          | 92±14          | 80±20          | 91±14          | 108±17         | 95±14          | 103±17         |
| White sorghum | Crumb texture [N]                 | 17±1.74ab      | 16±2.34a       | 18±3.53bc      | 18±2.87c       | 17±1.88ab      | 17±1.72bc      | 17±1.64ab      | 18±1.31c       | 18±1.5c        |
|               | Parameter compared to control [%] | 100±10         | 95±14          | 103±20         | 109±16         | 100±11         | 102±10         | 100±10         | 108±7          | 107±8          |
| Millet        | Crumb texture [N]                 | 25.45±5.76d    | 19.94±4.28ab   | 17.73±3.87a    | 20.85±4.55b    | 19.58±2.62ab   | 20.17±3.37ab   | 20.95±3.77b    | 22.15±6.53bc   | 24.58±9.35cd   |
|               | Parameter compared to control [%] | 100±23         | 78.35±21       | 69.67±22       | 81.93±22       | 76.94±13       | 79.25±17       | 82.32±18       | 87.03±29       | 96.58±38       |
| Amaranth      | Crumb texture [N]                 | 20.96±2.31ab   | 19.24±1.78a    | 23.89±3.88cd   | 22.77±4.41bcd  | 24.05±7.05cd   | 25.11±4.13de   | 23.93±3.71de   | 21.87±2.88abc  | 27.49±5.63e    |
|               | Parameter compared to control [%] | 100±11         | 92±9           | 114±16         | 109±19         | 115±29         | 120±16         | 114±16         | 104±13         | 131±20         |
| Buckwheat     | Crumb texture [N]                 | 17.14±3.55a    | 18.66±3.49abc  | 18.44±4.59abc  | 17.85±2.6ab    | 16.91±1.87a    | 19.77±2.42c    | 19.11±2.61bc   | 22.2±2.66d     | 24.47±5.03e    |
|               | Parameter compared to control [%] | 100±21         | 109±19         | 108±25         | 104±15         | 99±11          | 115±12         | 111±14         | 130±12         | 143±21         |
| Red sorghum   | Relative Elasticity [%]           | 46.65±1.14d    | 46.16±1.21d    | 45.57±0.97c    | 45.01±1.3bc    | 44.88±1.08b    | 44.54±1.04ab   | 44.88±0.83b    | 44.31±0.89a    | 44.19±0.84a    |
|               | Parameter compared to control [%] | 100±2          | 99±3           | 98±2           | 96±3           | 96±2           | 95±2           | 96±2           | 95±2           | 95±2           |
| White sorghum | Relative Elasticity [%]           | 47.01±1.06f    | 45.31±1.07bcd  | 45.78±0.93de   | 45.6±0.84cde   | 45.84±0.82e    | 45.41±0.82bcde | 45.01±0.86ab   | 45.17±0.71ab   | 44.62±0.83a    |
|               | Parameter compared to control [%] | 100±2          | 96±2           | 97±2           | 97±2           | 98±2           | 97±2           | 96±2           | 96±2           | 95±2           |
| Millet        | Relative Elasticity [%]           | 42.37±3.98ab   | 43.06±1.15b    | 42.93±0.93b    | 42.62±1.1b     | 42.88±1.05b    | 43.02±0.96b    | 42.31±1ab      | 42.75±1.2ab    | 41.94±1.46a    |
|               | Parameter compared to control [%] | 100±9          | 102±3          | 101±2          | 101±3          | 101±2          | 102±2          | 100±2          | 101±3          | 99±3           |
| Amaranth      | Relative Elasticity [%]           | 44.86±1.19c    | 44.41±0.97bc   | 44.15±1.06bc   | 44.27±0.89bc   | 41.07±2.61a    | 40.35±10.36a   | 42.25±1.49ab   | 42.03±1.67ab   | 41.48±2a       |
|               | Parameter compared to control [%] | 100±3          | 99±2           | 98±2           | 99±2           | 92±6           | 90±26          | 94±4           | 94±4           | 92±5           |
| Buckwheat     | Relative Elasticity [%]           | 45.74±0.89cd   | 45.66±0.68cd   | 45.85±0.66d    | 45.95±0.72d    | 45.9±0.61d     | 45.42±0.77b    | 44.81±0.73b    | 44.46±0.76b    | 44.05±1.01a    |
|               | Parameter compared to control [%] | 100±11         | 92±9           | 114±16         | 109±19         | 115±29         | 120±16         | 114±16         | 104±13         | 131±20         |
| Red sorghum   | Baking loss [%]                   | 4.92±0.56b     | 4.61±0.5ab     | 4.62±0.26ab    | 4.52±0.33b     | 4.45±0.18a     | 4.67±0.3ab     | 4.76±0.41ab    | 4.62±0.3ab     | 4.67±0.27ab    |
|               | Parameter compared to control [%] | 100±11         | 94±11          | 94±6           | 92±7           | 90±4           | 95±6           | 97±9           | 94±6           | 95±6           |
| White sorghum | Baking loss [%]                   | 4.85±0.39abc   | 4.54±0.26a     | 4.88±0.4bc     | 4.66±0.54ab    | 5.27±0.29d     | 5.1±0.22cd     | 4.89±0.38bc    | 5.04±0.37de    | 5.03±0.14cd    |
|               | Parameter compared to control [%] | 100±8          | 94±6           | 101±8          | 96±12          | 109±6          | 105±4          | 101±8          | 104±7          | 104±3          |
| Millet        | Baking loss [%]                   | 5.63±0.71a     | 5.57±1.05a     | 5.59±1.36a     | 7.58±0.51c     | 6.51±1.26ab    | 6.83±1.5cd     | 6.29±1.12ab    | 6.47±1.08ab    | 6.33±0.83ab    |
|               | Parameter compared to control [%] | 100±13         | 99±19          | 99±24          | 135±7          | 116±19         | 121±22         | 112±18         | 115±17         | 112±13         |
| Amaranth      | Baking loss [%]                   | 7.87±1.19ab    | 7.7±1.52a      | 9.14±0.25c     | 8.73±0.53bc    | 7.93±0.95ab    | 8.01±0.49ab    | 8.67±0.33bc    | 8.25±0.12abc   | 8.4±0.54abc    |
|               | Parameter compared to control [%] | 100±15         | 98±20          | 116±3          | 111±6          | 101±12         | 102±6          | 110±4          | 105±1          | 107±6          |
| Buckwheat     | Baking loss [%]                   | 8.74±0.75b     | 8.61±0.71b     | 8.73±0.32b     | 8.52±0.62ab    | 9.04±0.53b     | 8.56±0.6b      | 8.37±1.02ab    | 8.43±1.08ab    | 7.75±1.27a     |
|               | Parameter compared to control [%] | 100±9          | 99±8           | 100±4          | 97±7           | 103±6          | 98±7           | 96±12          | 96±13          | 89±16          |

Different superscript letters denote significant differences within the same row (evaluated by the Fisher's Least Significant Difference test)

**Table S4.** SWB and MWB crumb colors (L\*a\*b\* values).

| Parameter      | Cereal          | 0%           | 5%           | 10%           | 15%          | 20%          | 25%          | 30           | 35           | 40           |
|----------------|-----------------|--------------|--------------|---------------|--------------|--------------|--------------|--------------|--------------|--------------|
| SWB - L* Crumb | Sorghum Armorik | 70.97±8.38a  | 66.8±9.89bc  | 64.71±10.87bc | 67.72±2.22ab | 66.63±1.47bc | 60.02±5.93ab | 63.42±3.11cd | 58.47±5.35e  | 57.46±5.83e  |
|                | Sorghum Ggolden | 75.39±2.04a  | 73.78±1.63b  | 73.46±1.28b   | 71.72±1.42c  | 70.55±1.33ef | 71.06±1.91cd | 69.55±1.82fg | 68.61±2.98g  | 68.6±3.06g   |
|                | Millet          | 75.08±2.3ab  | 75.17±2.38ab | 76.01±2.5bc   | 74.78±3.21a  | 76.75±2.28c  | 75.08±1.73ab | 76.08±1.47bc | 76.58±1.63c  | 76.09±2.04c  |
|                | Amaranth        | 71.31±1.5a   | 68.12±1.36b  | 65.24±3.07c   | 64.24±0.92cd | 63.82±0.93d  | 63.63±0.29d  | 60.07±1.38ef | 61.11±0.67e  | 59.72±1.22f  |
|                | Buckwheat       | 76.61±4.03a  | 74.32±2.28b  | 72.18±2.9c    | 69.19±3.19d  | 69.18±2.07d  | 68.21±3.12d  | 65.75±3.08e  | 63.63±1.53f  | 62.49±1.82f  |
| SWB - a* Crumb | Sorghum Armorik | 6.71±6.1a    | 7.04±4.88ab  | 7.56±4.58ab   | 6.61±0.56a   | 7.14±0.68ab  | 8.78±1.6cd   | 8.49±0.9bcd  | 9.14±1.14cd  | 9.54±0.96d   |
|                | Sorghum Ggolden | 3.88±0.39a   | 4.19±0.5ab   | 4.49±0.57bc   | 4.84±0.56cd  | 5.15±0.65d   | 5.57±0.73e   | 6.03±0.79f   | 6.4±1.01fg   | 6.64±0.99g   |
|                | Millet          | 3.99±0.92a   | 3.95±0.85ab  | 3.76±0.83abc  | 3.95±0.8ab   | 3.54±0.66c   | 3.51±0.73c   | 3.57±0.49bc  | 3.64±0.58abc | 3.61±0.48abc |
|                | Amaranth        | 5.01±0.85a   | 5.95±0.48b   | 6.16±0.34b    | 6.94±0.39c   | 7.66±0.55d   | 8.22±0.34e   | 8.85±0.75f   | 8.76±0.27f   | 9.12±0.43f   |
|                | Buckwheat       | 4.39±0.48ab  | 4.18±0.43ab  | 4.45±0.49b    | 4.78±0.57c   | 4.6±0.53bc   | 4.81±0.5c    | 5.1±0.47d    | 5.58±0.41e   | 5.56±0.4e    |
| SWB - b* Crumb | Sorghum Armorik | 23.17±4.83a  | 21.88±3.11bc | 21.22±2bc     | 20.26±0.54cd | 19.63±0.73d  | 19.92±0.96d  | 20.12±1.08ab | 19.81±0.91d  | 20.2±0.75cd  |
|                | Sorghum Ggolden | 21.63±0.81a  | 20.99±0.9b   | 20.9±0.81b    | 20.1±0.8c    | 19.78±0.65cd | 19.82±0.82cd | 19.55±0.75d  | 19.62±0.64d  | 19.48±0.62d  |
|                | Millet          | 20.37±1.09a  | 21.14±1.25b  | 21.26±1.16bc  | 21.38±0.99bc | 21.66±1bcd   | 21.6±1.21bcd | 21.89±0.93cd | 22.19±1.25de | 22.65±1.71e  |
|                | Amaranth        | 24.31±0.44a  | 25.33±0.54b  | 25.55±0.6b    | 25.97±0.36b  | 27.13±1.05c  | 27.45±1.58cd | 28.14±1.05cd | 27.72±1.33cd | 27.66±1d     |
|                | Buckwheat       | 21.39±0.74a  | 20.19±0.86b  | 19.73±0.75c   | 18.92±1.02d  | 18.36±0.6e   | 18.1±0.79ef  | 17.72±1.13f  | 17±0.66g     | 16.53±0.45h  |
| MWB - L* Crumb | Sorghum Armorik | 80.34±1.3a   | 77.18±0.95b  | 74.37±1.46c   | 73.9±1.61c   | 71.5±1.56d   | 69.49±1.61e  | 67.71±1.1f   | 66.13±1.45g  | 65.5±1.53g   |
|                | Sorghum Ggolden | 79.95±1.17a  | 78.29±1.48b  | 77.32±1.18c   | 75.37±1.72d  | 75.08±0.81d  | 73.7±1.28e   | 73.09±1.01e  | 71.4±1.55f   | 68.96±1.57g  |
|                | Millet          | 83.17±5.08bc | 83.42±5.87bc | 83.52±4.78c   | 81.34±1.79ab | 82.8±3.9bc   | 84.26±3.96c  | 84.29±4.35c  | 80.18±2.86a  | 80.21±2.06a  |
|                | Amaranth        | 82.48±2.3f   | 81.23±2.18f  | 78.68±2.37e   | 75.37±2.29d  | 73.8±2.09bc  | 74.76±1.88cd | 72.96±1.61b  | 72.47±0.98b  | 70.15±3.21a  |
|                | Buckwheat       | 80.5±2.35a   | 80.12±1.54a  | 79.13±2.44b   | 76.72±1.3c   | 75.01±1.57d  | 74.39±1.52de | 73.71±1.01ef | 72.92±1.04f  | 70.11±1.19g  |
| MWB - a* Crumb | Sorghum Armorik | 4.43±0.43a   | 4.97±0.57b   | 5.67±0.54c    | 6.16±0.64d   | 7±0.43e      | 7.59±0.6f    | 7.86±0.51fg  | 8.1±0.69g    | 8.56±0.59h   |
|                | Sorghum Ggolden | 3.95±0.42a   | 4.35±0.56b   | 4.91±0.51c    | 5.23±0.5d    | 5.63±0.79e   | 5.82±0.64ef  | 6.07±0.61fg  | 6.24±0.63gh  | 6.43±0.52h   |
|                | Millet          | 3.79±0.88abc | 3.8±0.89abc  | 4.03±0.72bcd  | 4.37±0.5d    | 3.67±0.85ab  | 3.76±0.78abc | 3.46±0.98a   | 4.11±0.42cd  | 4.34±0.43d   |
|                | Amaranth        | 4.25±0.54a   | 4.54±0.42b   | 4.76±0.32bc   | 5.03±0.5c    | 5.55±0.37d   | 5.63±0.46d   | 5.97±0.46e   | 6.5±0.48f    | 6.87±0.4g    |
|                | Buckwheat       | 4.38±0.57a   | 4.34±0.5a    | 4.66±0.53b    | 4.67±0.49b   | 4.86±0.47bc  | 5.06±0.53c   | 5.42±0.47d   | 5.56±0.43de  | 5.71±0.54e   |
| MWB - b* Crumb | Sorghum Armorik | 26.42±0.7a   | 25.36±1.02b  | 24.95±0.7c    | 24.08±0.95d  | 23.69±0.69d  | 22.81±0.71e  | 22.59±0.46e  | 21.86±0.63f  | 22.01±0.62f  |
|                | Sorghum Ggolden | 26.02±0.81a  | 25.76±0.36ab | 25.45±0.58b   | 25±0.58c     | 24.64±0.71c  | 24.22±0.58d  | 23.44±0.42e  | 23.98±1.28d  | 22.79±0.68f  |
|                | Millet          | 25.7±1.13a   | 25.72±0.78a  | 27.05±0.84b   | 27.61±1.02b  | 27.28±1.51b  | 27.37±1.02b  | 27.63±1.38b  | 28.58±0.87c  | 29.48±1.33d  |
|                | Amaranth        | 25.27±0.72a  | 26.12±0.5b   | 26.01±0.45b   | 26.68±0.58c  | 27.17±0.63cd | 26.85±0.95cd | 26.45±0.71bc | 27.46±0.59de | 27.69±1.12e  |
|                | Buckwheat       | 25.55±0.74ab | 25.68±0.78a  | 25.13±0.82bc  | 24.77±0.47cd | 24.54±0.55d  | 24.35±0.42d  | 23.59±0.94e  | 23.41±0.99e  | 22.8±1.07f   |
